# Supplementary material
Source: PubMed Central journal article supplement (PMC5065394)
Supplement: NIHMS819816-supplement-Suppmental_Figure_2.pdf [file NIHMS819816-supplement-Suppmental_Figure_2.pdf]

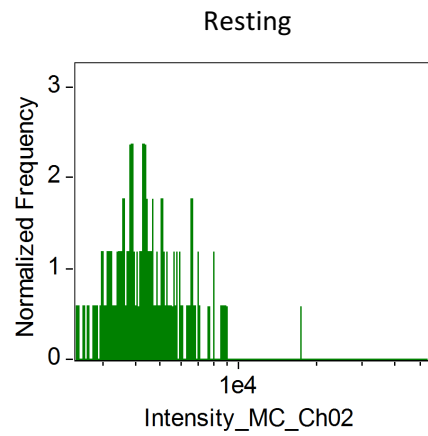

Intensity\_MC\_Ch02

| Population   | Median  | Geo. Mean |
|--------------|---------|-----------|
| CD8+ & cells | 4241.43 | 4172.68   |

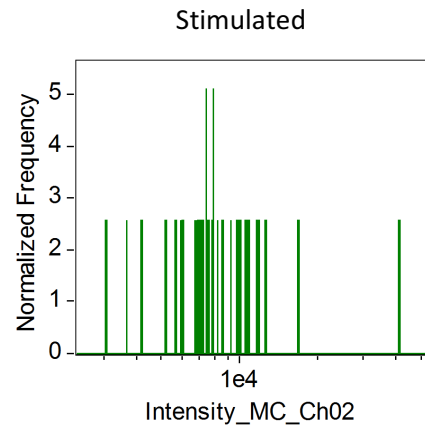

Intensity\_MC\_Ch02

| Population   | Median  | Geo. Mean |
|--------------|---------|-----------|
| CD8+ & cells | 7916.85 | 8218.87   |
