# Supplementary material
Source: PubMed Central journal article supplement (PMC5065394)

Acute stimulation (30 min)

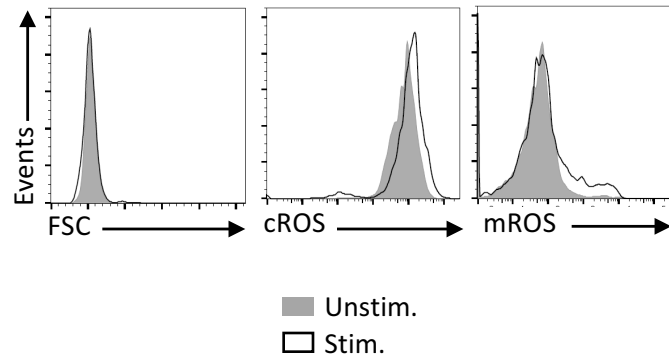

**Suppl.Fig.1**

Supplement: NIHMS819816-supplement-Suppmental_Figure_1.pdf [file NIHMS819816-supplement-Suppmental_Figure_1.pdf]

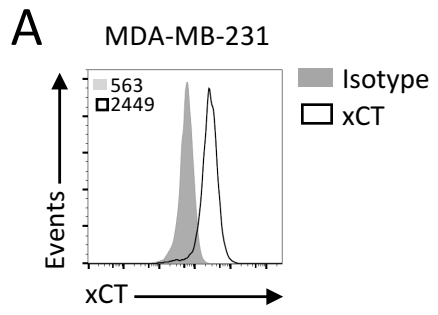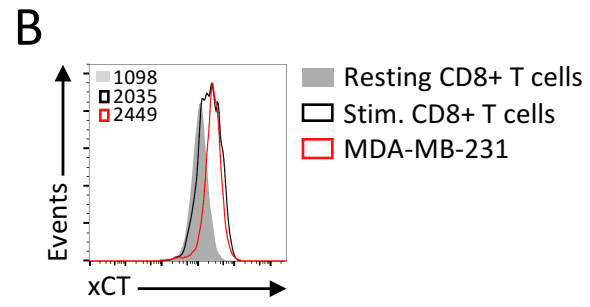

Supplement: NIHMS819816-supplement-Suppmental_Figure_3.pdf [file NIHMS819816-supplement-Suppmental_Figure_3.pdf]

**A**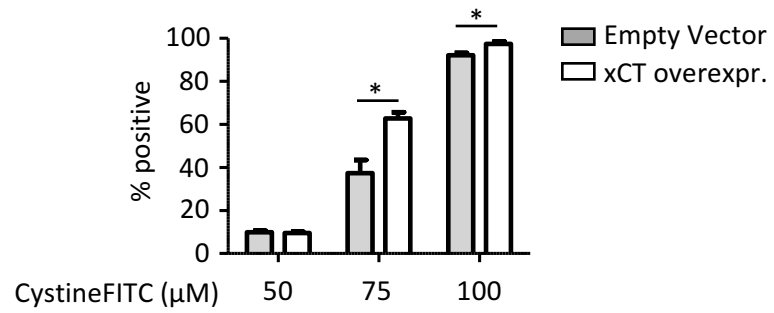**B**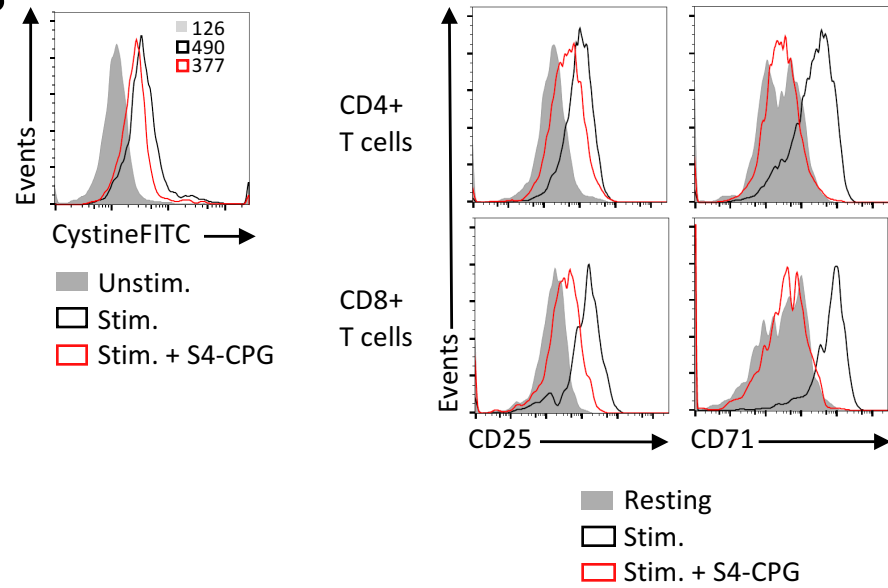

Supplement: NIHMS819816-supplement-Suppmental_Figure_4.pdf [file NIHMS819816-supplement-Suppmental_Figure_4.pdf]
